# Supplementary material for: Prevalence, Virulence Feature, Antibiotic Resistance and MLST Typing of Bacillus cereus Isolated From Retail Aquatic Products in China
Source: Front Microbiol. 2020 Jul 3;11:1513. doi: 10.3389/fmicb.2020.01513 (PMC7347965; doi:10.3389/fmicb.2020.01513)
Supplement: Supplementary file 8 [file Table_4.DOCX]

**SUPPLEMENTARY TABLE S4** Prevalence of *B. cereus* isolated from aquatic samples in seven geographic regions and 39 cities of China.

| **China geographical division** | **Prevalence rate of geographical division (%)** | **City** | **Prevalence rate of city (%)** |
| --- | --- | --- | --- |
| **C** | 23.33 | Zhengzhou | 15.00 |
| Wuhan | 20.00 |
| Changsha | 35.00 |
| **E** | 25.63 | Fuzhou | 15.00 |
| Hangzhou | 20.00 |
| Hefei | 20.00 |
| Nanjing | 20.00 |
| Shanghai | 20.00 |
| Xiamen | 30.00 |
| Nanchang | 35.00 |
| Jinan | 45.00 |
| **N** | 20.00 | Hohhot | 10.00 |
| Shijiazhuang | 15.00 |
| Taiyuan | 25.00 |
| Beijing | 30.00 |
| **NE** | 20.00 | Shenyang | 10.00 |
| Changchun | 15.00 |
| Harbin | 35.00 |
| **NW** | 21.00 | Yinchuan | 10.00 |
| Xi’an | 15.00 |
| Urumqi | 20.00 |
| Xining | 30.00 |
| Lanzhou | 30.00 |
| **S** | 30.94 | Hong Kong | 0 |
| Macao | 5.00 |
| Haikou | 10.00 |
| Beihai | 20.00 |
| Zhanjiang | 20.00 |
| Sanya | 25.00 |
| Shenzhen | 35.00 |
| Nanning | 40.00 |
| Shantou | 40.00 |
| Guangzhou | 41.00 |
| Heyuan | 45.00 |
| Shaoguan | 50.00 |
| **SW** | 20.00 | Kunming | 15.00 |
| Chengdu | 20.00 |
| Lhasa | 15.00 |
| Guiyang | 30.00 |

C, central China; E, east China; N, north China; NE, northeast China; NW, northwest China; S, south China; SW, southwest China.
